# Supplementary material for: Optional Exam Retakes Reduce Anxiety but may Exacerbate Score Disparities Between Students with Different Social Identities
Source: Atypon-hosted journal article supplement (doi:10.1187/cbe.21-11-0320), 2024-06-20
Supplement: combinedsupmats.pdf [file combinedsupmats.pdf]

# Supplemental Material

*CBE—Life Sciences Education*

Supriya *et al.*

|                                                                                                                                                                                                           |    |
|-----------------------------------------------------------------------------------------------------------------------------------------------------------------------------------------------------------|----|
| Table S1: Demographics of survey respondents pooled across the three post-exam<br>retake surveys in Courses 1 and 2. ....                                                                                 | 2  |
| Table S2: Percentage of survey responses where an option was selected by a student<br>as their reason for retaking the exam and demographic differences in the likelihood of<br>picking an option. ....   | 3  |
| Table S3: Percentage of survey responses where an option was picked by a student as<br>their reason for not retaking the exam and demographic differences in the likelihood of<br>picking an option. .... | 3  |
| Table S4: Percentage of survey responses that indicated agreement with a statement<br>and demographic differences in the likelihood of agreement. ....                                                    | 4  |
| Figure S1: Odds ratios for exam score on first attempt (i.e., “First attempt score”) and<br>demographic variables on students’ likelihood of retaking exams in Course 1. ....                             | 6  |
| Figure S2: Odds ratios for exam score on first attempt (i.e., “First attempt score”) and<br>demographic variables on students’ likelihood of retaking exams in Course 2. ....                             | 7  |
| Figure S3: Odds ratios for exam score before a given retake opportunity and<br>demographic variables on students’ likelihood of retaking exams in Course 3. ....                                          | 8  |
| Figure S4: Boxplot of student score on first attempt and retakes by gender. ....                                                                                                                          | 9  |
| Figure S5: Boxplot of student score on first attempt and retakes by race/ethnicity. ....                                                                                                                  | 10 |
| Figure S6: Boxplot of student score on first attempt and retakes by Pell-eligibility. ....                                                                                                                | 11 |
| Figure S7: Boxplot of student score on first attempt and retakes by number of hours a<br>student worked a job during the semester. ....                                                                   | 12 |
| Survey Questions.....                                                                                                                                                                                     | 13 |
| The following questions were presented to students who said they retook exam X.                                                                                                                           | 13 |
| The following questions were presented to students who said they did not retake<br>exam X.....                                                                                                            | 16 |

**Table S1: Demographics of survey respondents pooled across the three post-exam retake surveys in Courses 1 and 2.**

Please note that students could have filled out the survey more than once, so this table does not indicate unique survey respondents.

|                               | <b>Course 1</b>  | <b>Course 2</b>  |
|-------------------------------|------------------|------------------|
|                               | <b>N = 1,337</b> | <b>N = 1,239</b> |
| <b>Gender</b>                 |                  |                  |
| Female                        | 935 (70%)        | 889 (72%)        |
| Male                          | 402 (30%)        | 350 (28%)        |
| <b>Race/Ethnicity</b>         |                  |                  |
| Asian American                | 235 (18%)        | 226 (18%)        |
| Black/African American        | 65 (4.9%)        | 54 (4.4%)        |
| Hispanic/Latinx               | 307 (23%)        | 251 (20%)        |
| International                 | 52 (3.9%)        | 58 (4.7%)        |
| Multiracial                   | 76 (5.7%)        | 69 (5.6%)        |
| White                         | 602 (45%)        | 581 (47%)        |
| <b>Pell-eligible</b>          | 441 (33%)        | 372 (30%)        |
| <b>Number of hours worked</b> |                  |                  |
| No                            | 797 (60%)        | 873 (70%)        |
| ≤20 hours                     | 400 (30%)        | 218 (18%)        |
| >20 hours                     | 140 (10%)        | 148 (12%)        |

**Table S2: Percentage of survey responses where an option was selected by a student as their reason for retaking the exam and demographic differences in the likelihood of picking an option.**

Students were asked to select all the options that apply to them. We pooled data from all three surveys here. - indicates that we did not run linear mixed effects for those because very few students (less than 10%) picked that option across all surveys in both courses. We accounted for multiple responses from the same student by using student ID as a random effect with varying intercepts in our models. We controlled for total student scores on first exam attempts in the models reported here.

|                                    | Course 1       | Summary of demographic differences                 | Course 2         | Summary of demographic differences                                        |
|------------------------------------|----------------|----------------------------------------------------|------------------|---------------------------------------------------------------------------|
|                                    | <b>N = 880</b> |                                                    | <b>N = 1,033</b> |                                                                           |
| I was not satisfied with my score  | 77.16          | Asian American students more likely to pick        | 86.66            | No demographic differences                                                |
| I thought I could improve my score | 79.77          | Men and International students less likely to pick | 73.22            | Men, International students, & Pell-eligible students less likely to pick |
| First attempt was encouraging      | 19.89          | Men more likely to pick                            | 7.32             | No demographic differences                                                |
| To help learn the material better  | 44.43          | No demographic differences                         | 48.24            | Men less likely to pick                                                   |
| To practice my test-taking skills  | 22.84          | No demographic differences                         | 20.16            | No demographic differences                                                |
| Because my friends were retaking   | 5.45           | -                                                  | 4.41             | -                                                                         |
| To impress my instructor           | 1.93           | -                                                  | 2.51             | -                                                                         |

**Table S3: Percentage of survey responses where an option was picked by a student as their reason for not retaking the exam and demographic differences in the likelihood of picking an option.**

Students were asked to select all the options that apply to them. We pooled data from all three surveys here. - indicates that we did not run linear mixed effects for those because very few students (less than 10%) picked that option across all surveys in both courses. n/a indicates options that were not applicable to the course. We accounted for multiple responses from the same student by using student as a random effect with varying intercepts in our models. We controlled for total student scores on first exam attempts in the models reported here.

|                                            | Course 1       | Notes                                                                                    | Course 2       | Notes                                           |
|--------------------------------------------|----------------|------------------------------------------------------------------------------------------|----------------|-------------------------------------------------|
|                                            | <b>N = 447</b> |                                                                                          | <b>N = 261</b> |                                                 |
| I was satisfied with my score              | 75.17          | Students who work 1-20h/w less likely to pick & multiracial students more likely to pick | 58.54          | No demographic differences                      |
| I was discouraged by my score              | 4.01           | -                                                                                        | 9.35           | -                                               |
| I didn't think I could improve my score    | 34.9           | Men less likely to pick                                                                  | 28.05          | Latinx students less likely to pick             |
| Taking exams makes me anxious              | 12.3           | No demographic differences                                                               | 13.41          | No demographic differences                      |
| Too difficult to come to campus for retake | 13.87          | No demographic differences                                                               | n/a            |                                                 |
| Signing up process was difficult           | 2.88           | -                                                                                        | n/a            |                                                 |
| Scheduling conflicts                       | 26.52          | No demographic differences                                                               | n/a            |                                                 |
| Too busy                                   | 19.24          | No demographic differences                                                               | 33.74          | Pell-eligible students were less likely to pick |
| Didn't feel like it                        | 10.74          | Students who work 1-20h/w less likely to pick                                            | 10.16          | Pell-eligible students were more likely to pick |
| Planned to retake, but forgot              | 5.82           | -                                                                                        | n/a            |                                                 |

**Table S4: Percentage of survey responses that indicated agreement with a statement and demographic differences in the likelihood of agreement.**

We pooled data from all three surveys here. X indicates that we did not run linear mixed effects for those because very few or too many students (less than 10% or more than 90%) picked that option across all surveys in both courses. n/a indicates options that were not applicable to the course. We accounted for multiple responses from the same student by using student as a random effect with varying intercepts in our models. We controlled for total student scores on first exam attempts in the models reported here. We did not control for student exam scores here, but include a similar table in the supplement that presents model results after controlling for total score on first exam attempts.

|                                   | Course 1            | Notes | Course 2              | Notes |
|-----------------------------------|---------------------|-------|-----------------------|-------|
| <b>Students that retook exams</b> | %<br><b>N = 880</b> |       | %<br><b>N = 1,033</b> |       |

|                                                             |                       |                                                                                                                                  |                       |                                                                                                    |
|-------------------------------------------------------------|-----------------------|----------------------------------------------------------------------------------------------------------------------------------|-----------------------|----------------------------------------------------------------------------------------------------|
| Retaking this exam helped my learning                       | 96.7                  | x                                                                                                                                | 94.68                 | x                                                                                                  |
| Retaking reduced my anxiety about taking tests              | 81.48                 | No demographic differences                                                                                                       | 83.85                 | No demographic differences                                                                         |
| Put a lot of effort into studying for retake                | 86.36                 | No demographic differences                                                                                                       | 85.86                 | International students and students that worked >20h/w less likely to agree                        |
| Felt nervous retaking                                       | 52.73                 | Asian American students and students who worked >20h/w more likely to agree; men and Pell-eligible students less likely to agree | 60.88                 | Asian American students more likely to agree & International students and men less likely to agree |
| Anxious while retaking                                      | 48.98                 | Asian American students and students that worked >20h/w more likely to agree; men less likely to agree                           | 56.24                 | Asian American students more likely to agree & men less likely to agree                            |
| Preparing & retaking was too time consuming                 | 22.16                 | Asian American students more likely to agree                                                                                     | 25.78                 | No demographic differences                                                                         |
| Finding the time was challenging                            | 20.22                 | Asian American students and students who work >20h more likely to agree                                                          | n/a                   | n/a                                                                                                |
| <b>Students that did not retake exams</b>                   | %<br><b>N = 447</b>   |                                                                                                                                  | %<br><b>N = 261</b>   |                                                                                                    |
| Retaking this exam would <b>not</b> have helped my learning | 23.04                 | Men and Black students were more likely to agree                                                                                 | 8.89                  | No demographic differences                                                                         |
| I did not retake because of test anxiety                    | 23.49                 | No demographic differences                                                                                                       | 30.08                 | No demographic differences                                                                         |
| Appreciate opportunity to retake exams                      | 98.88                 | x                                                                                                                                | 97.97                 | x                                                                                                  |
| <b>All students</b>                                         | %<br><b>N = 1,337</b> |                                                                                                                                  | %<br><b>N = 1,290</b> |                                                                                                    |
| Lower anxiety on initial exam                               | 89.3                  | No demographic differences                                                                                                       | 91.53                 | No demographic differences                                                                         |

|                               |       |                                                                                                            |       |                                                       |
|-------------------------------|-------|------------------------------------------------------------------------------------------------------------|-------|-------------------------------------------------------|
| Stayed calmer on initial exam | 81.97 | Latinx students less likely to agree                                                                       | 86.92 | No demographic differences                            |
| Studied less for initial exam | 20.19 | International students less likely to agree                                                                | 32.12 | Students who did not retake exam less likely to agree |
| Like exam retakes             | 99.33 | x                                                                                                          | 98.63 | x                                                     |
| Prefer regular hours          | 43.08 | Students who did not retake exam, International students, & students who work 1-20h/w more likely to agree | n/a   | n/a                                                   |

**Figure S1: Odds ratios for exam score on first attempt (i.e., “First attempt score”) and demographic variables on students’ likelihood of retaking exams in Course 1.**

Blue dots indicate positive effects and red dots indicate negative effects, grey line indicates no significant effect. If the error bar overlaps the grey line, the effect is not statistically significant.

\* $p < 0.05$ , \*\* $p < 0.01$ , \*\*\* $p < 0.001$

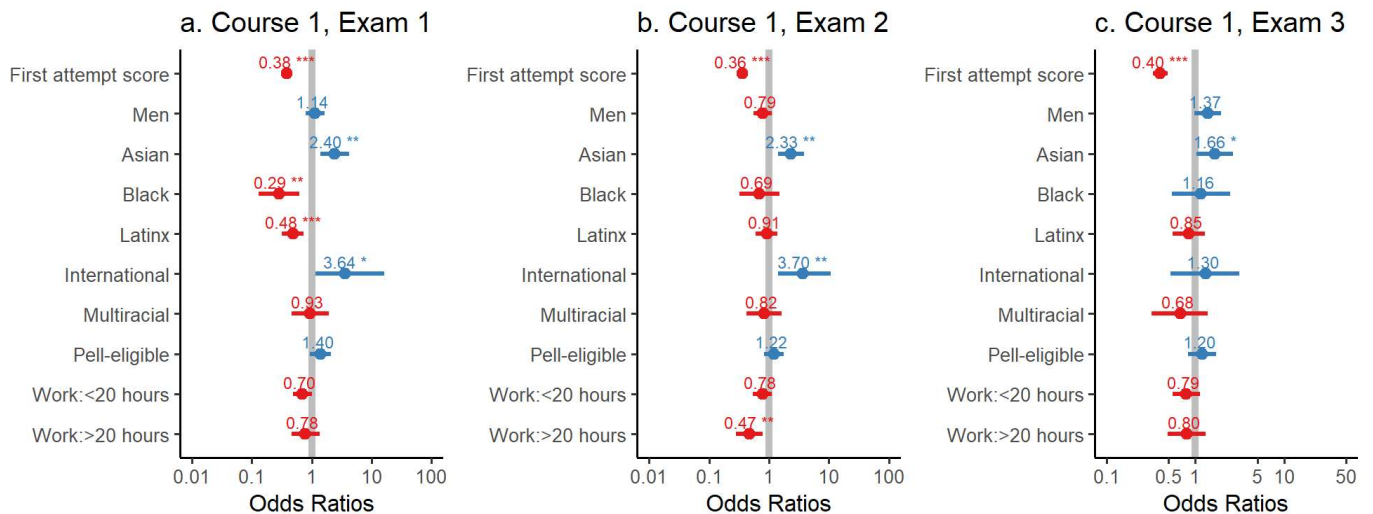

**Figure S2: Odds ratios for exam score on first attempt (i.e., “First attempt score”) and demographic variables on students’ likelihood of retaking exams in Course 2.**

Blue dots indicate positive effects and red dots indicate negative effects, grey line indicates no significant effect. If the error bar overlaps the grey line, the effect is not statistically significant. \* $p < 0.05$ , \*\* $p < 0.01$ , \*\*\* $p < 0.001$

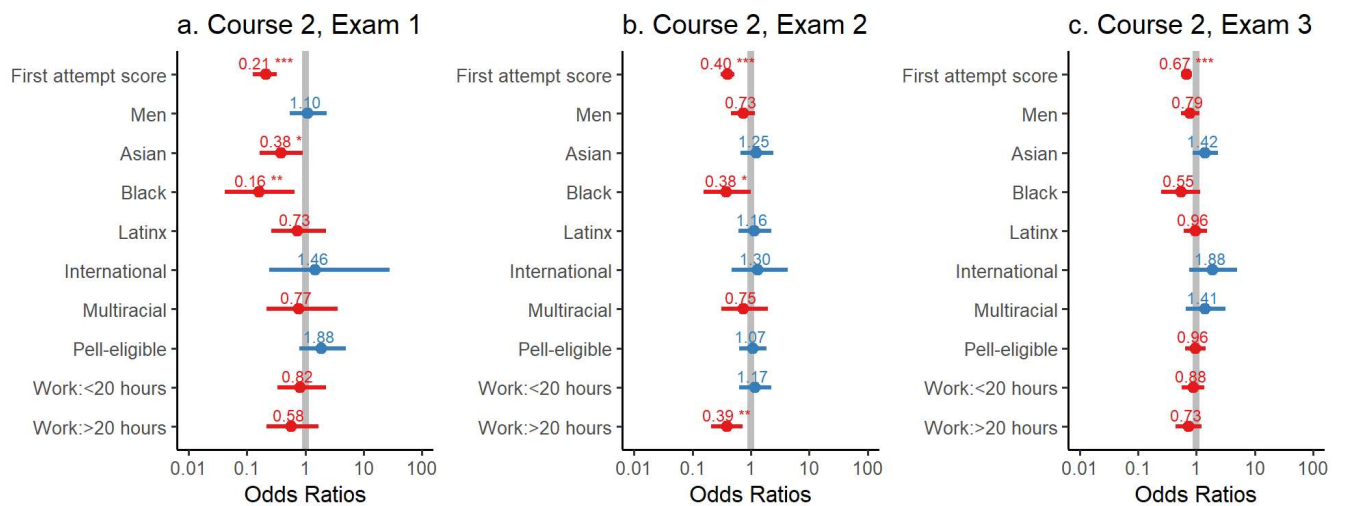



**Figure S3: Odds ratios for exam score before a given retake opportunity and demographic variables on students' likelihood of retaking exams in Course 3.**

Blue dots indicate positive effects and red dots indicate negative effects, grey line indicates no significant effect. If the error bar overlaps the grey line, the effect is not statistically significant.

\* $p < 0.05$ , \*\* $p < 0.01$ , \*\*\* $p < 0.001$

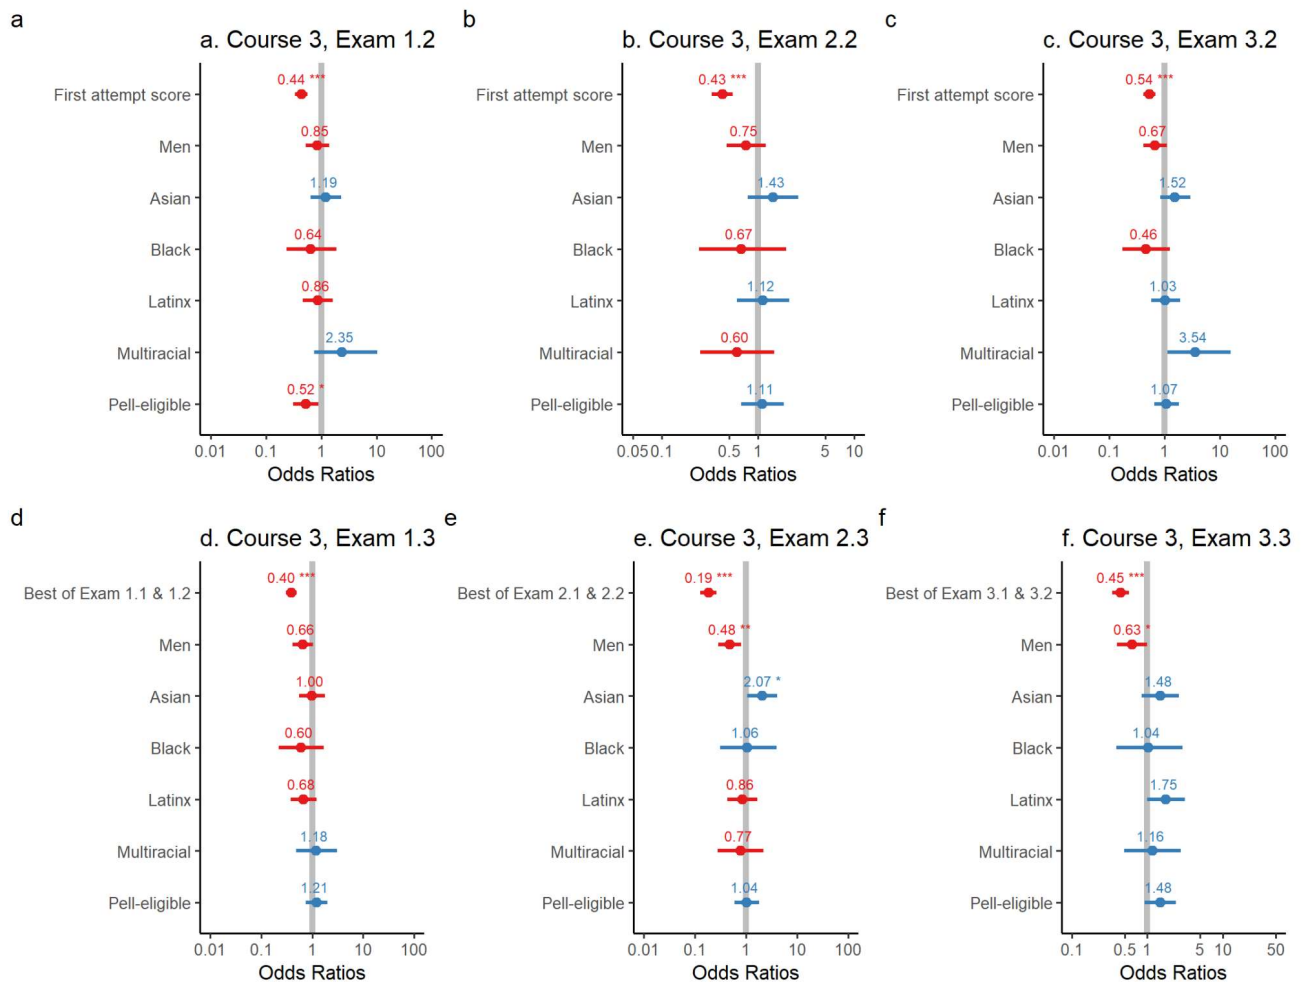

**Figure S4: Boxplot of student score on first attempt and retakes by gender.**

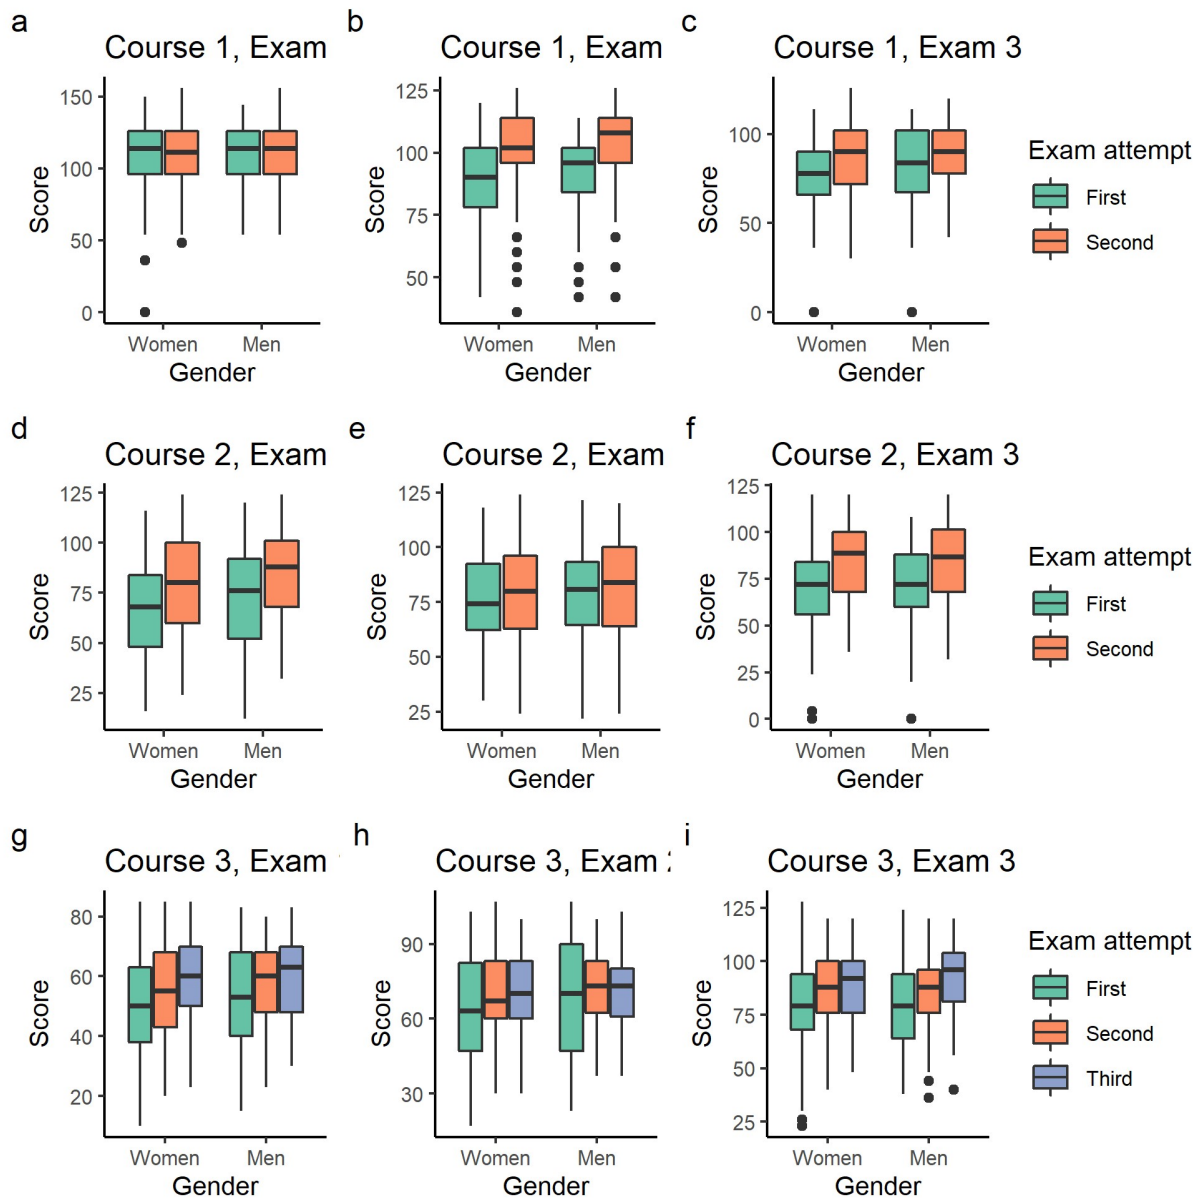

**Figure S5: Boxplot of student score on first attempt and retakes by race/ethnicity.**

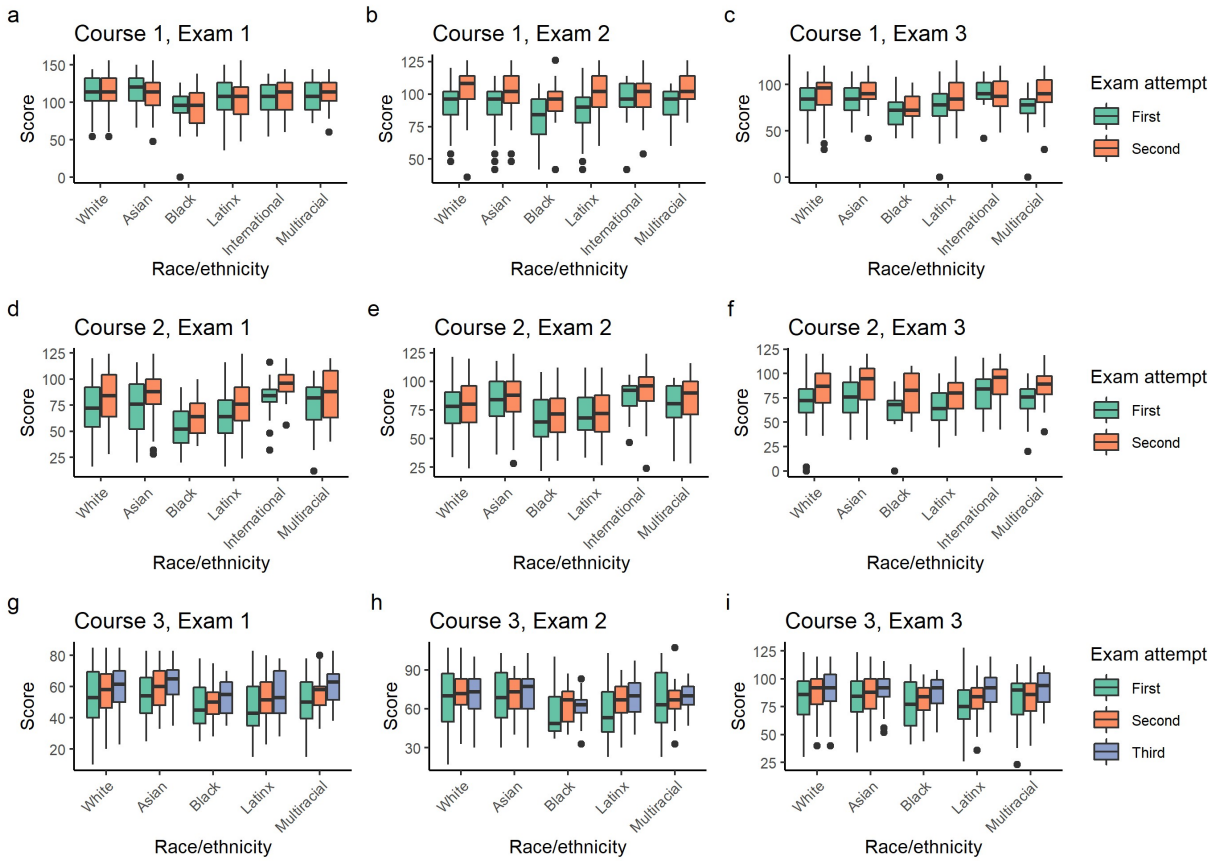

**Figure S6: Boxplot of student score on first attempt and retakes by Pell-eligibility.**

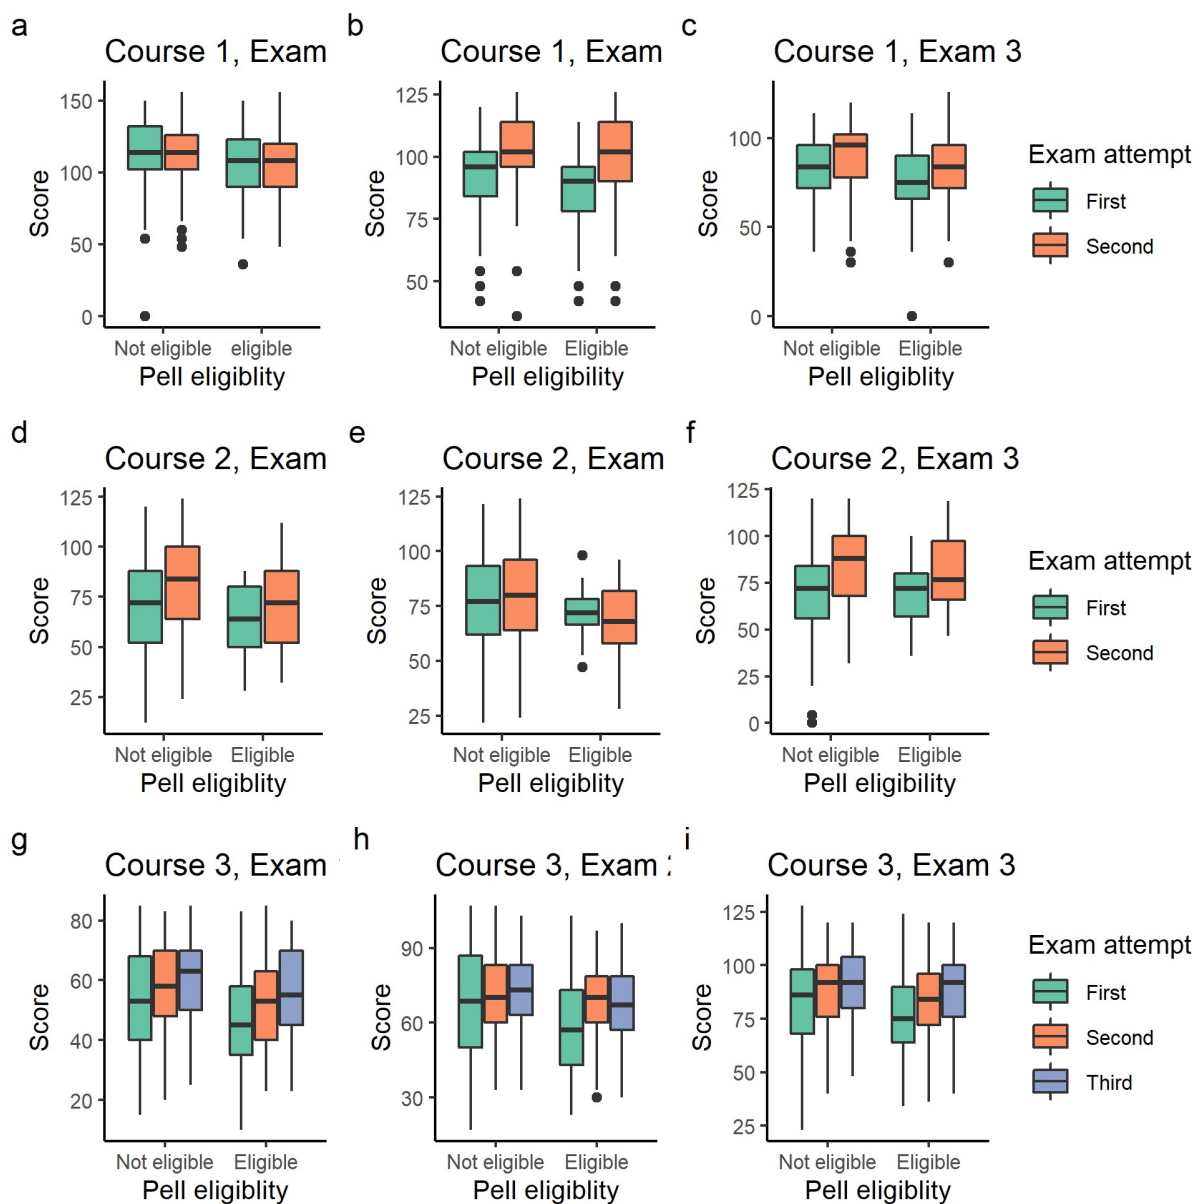

**Figure S7: Boxplot of student score on first attempt and retakes by number of hours a student worked a job during the semester.**

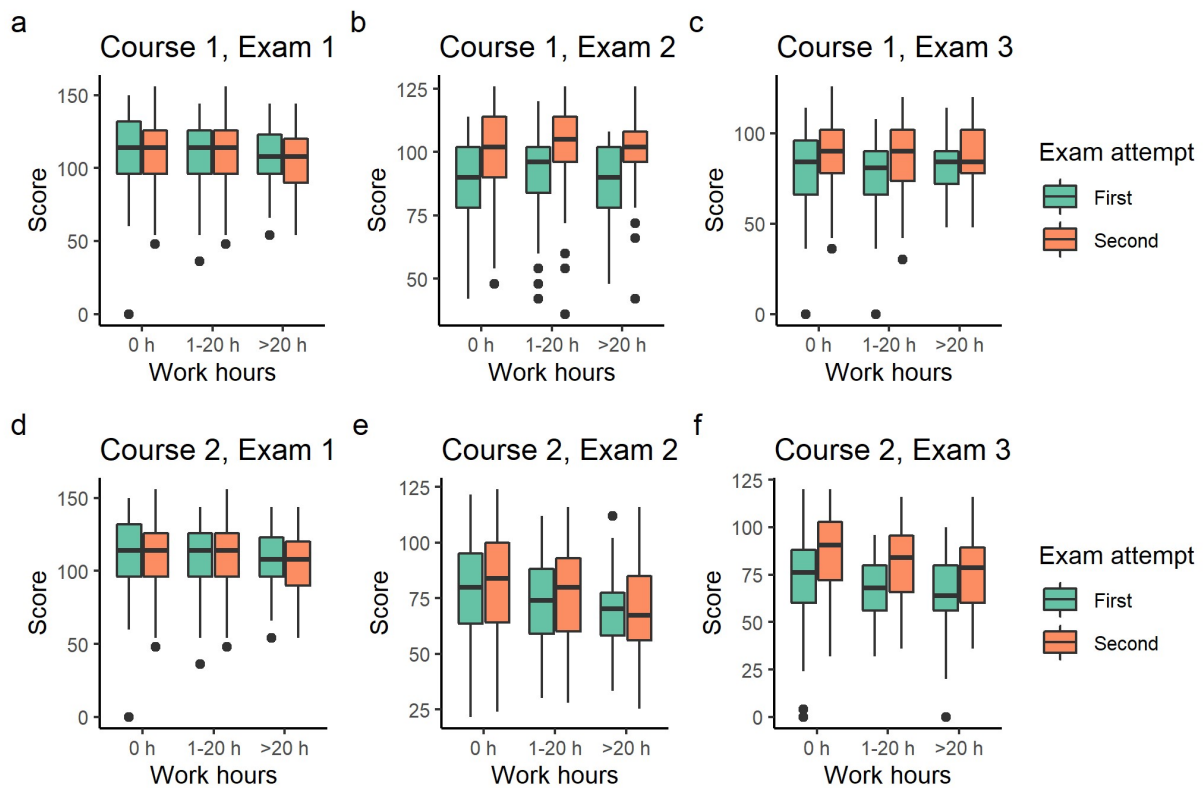

## Survey Questions

Q1 Did you retake exam X for BIOxxx?

Yes

No

**The following questions were presented to students who said they retook exam X**

Q2 Please explain why you retook the exam in 1-2 sentences. Be as detailed as possible.

---

Q3 Of the following options, which ones explain why you retook the exam? Please select all that apply to you.

I was not satisfied with my score on the exam when I first took it

I did well when I first took the exam, which encouraged me to try again

I thought I could improve my score on the exam by retaking it

I thought it would help me learn the material better

My friends were retaking the exam, so I retook it as well

I wanted to impress my instructor

I wanted to practice my test-taking skills

Other, please specify \_\_\_\_\_

Q4 Retaking this exam helped my learning

- Strongly agree
- Agree
- Somewhat agree
- Somewhat disagree
- Disagree
- Strongly disagree

Q5 Please explain how retaking the exam helped or did not help your learning in 1-2 sentences. Be as detailed as possible.

---

Q6 Retaking this exam reduced my anxiety about taking tests in BIOxxx

- Strongly agree
- Agree
- Somewhat agree
- Somewhat disagree
- Disagree
- Strongly disagree

Q7 Please explain how retaking the exam affected your anxiety about taking tests in BIOxxx in 1-2 sentences. Be as detailed as possible.

---

Q8 Please think of your experience with exam X in BIOxxx. For each of the following statements, please indicate how true it is for you:

|                                                                                                       | very untrue           | untrue                | somewhat untrue       | somewhat true         | true                  | very true             |
|-------------------------------------------------------------------------------------------------------|-----------------------|-----------------------|-----------------------|-----------------------|-----------------------|-----------------------|
| I put a lot of effort into studying for the exam retake                                               | <input type="radio"/> |
| I felt very nervous while retaking this exam                                                          | <input type="radio"/> |
| Preparing for and retaking this exam was too time consuming for me                                    | <input type="radio"/> |
| Finding the time to retake the exam was challenging for me                                            | <input type="radio"/> |
| Knowing that I had the opportunity to retake exam X reduced my anxiety about the initial exam         | <input type="radio"/> |
| I studied less for the initial exam since I could take the exam again                                 | <input type="radio"/> |
| Knowing that I had the opportunity to retake exam X helped me stay calm while taking the initial exam | <input type="radio"/> |
| I would like to have such exam retake opportunities in future courses                                 | <input type="radio"/> |
| I was anxious while retaking this exam                                                                | <input type="radio"/> |
| I would have preferred if the exam retake was scheduled during regular class meeting hours            | <input type="radio"/> |

Q9 Any other thoughts about your experience with exam retakes in BIOxxx that you would like to share?



---

The following questions were presented to students who said they did not retake exam X

Q10 Please explain why you did not retake the exam in 1-2 sentences. Be as detailed as possible.

---

Q11 Of the following options, which ones explain why you did not retake the exam? Please select all that apply to you.

- I was satisfied with my score on the exam when I first took it
- I did not do well when I first took the exam, which discouraged me from retaking the exam
- I did not think I could improve my score by retaking the exam
- Taking exams makes me anxious
- It was too difficult to come to campus the day of the retake
- The process of signing up for a time to retake the exam was difficult
- I had scheduling conflicts the day of the retake
- I am too busy with other things
- I just didn't feel like it
- I planned to retake the exam, but forgot
- Other, please specify \_\_\_\_\_

Q12 I think that retaking this exam would **not** have helped my learning

- Strongly disagree
- Disagree
- Somewhat disagree

Somewhat agree

Agree

Strongly agree

Q13 Please explain how retaking the exam would or would not have helped your learning in 1-2 sentences. Be as detailed as possible.

---

Q14 I did not retake this exam because of my anxiety about taking tests

Strongly disagree

Disagree

Somewhat disagree

Somewhat agree

Agree

Strongly agree

Q22 Please explain how your anxiety about taking tests affected or did not affect your decision regarding the exam retake in 1-2 sentences. Be as detailed as possible.

---

Q10 Please think of your experience with exam X in BIOxxx. For each of the following statements, please indicate how true it is for you.

|  |                |        |                    |                  |      |              |
|--|----------------|--------|--------------------|------------------|------|--------------|
|  | very<br>untrue | untrue | somewhat<br>untrue | somewhat<br>true | true | very<br>true |
|--|----------------|--------|--------------------|------------------|------|--------------|

---

|                                                                                                       |                       |                       |                       |                       |                       |                       |
|-------------------------------------------------------------------------------------------------------|-----------------------|-----------------------|-----------------------|-----------------------|-----------------------|-----------------------|
| I appreciated the opportunity to retake exams                                                         | <input type="radio"/> |
| Knowing that I had the opportunity to retake exam X reduced my anxiety about the initial exam         | <input type="radio"/> |
| I studied less for the initial exam since I could take the exam again                                 | <input type="radio"/> |
| Knowing that I had the opportunity to retake exam X helped me stay calm while taking the initial exam | <input type="radio"/> |
| I would like to have such exam retake opportunities in future courses                                 | <input type="radio"/> |
| I would have participated in the exam retake if it was scheduled during regular class meeting hours   | <input type="radio"/> |

Q11 Any other thoughts about your experience with exam retakes in BIOxxx that you would like to share?

---
